# Supplementary material for: A dual-mode system based on molybdophosphoric heteropoly acid and fluorescent microspheres for the reliable and ultrasensitive detection of alkaline phosphatase
Source: Royal Society of Chemistry journal article supplement (doi:10.1039/d2an02052a), 2023-01-01
Supplement: d2an02052a1.pdf [file d2an02052a1.pdf]

## Supporting Information

### **Molybdophosphoric heteropoly acid and fluorescent microsphere-based dual-mode system for reliable and ultrasensitive alkaline phosphatase detection**

Qiannan Li<sup>a</sup>, Yufei Wang<sup>a</sup>, Qianqian Zhu <sup>a, \*</sup>, Haifang Liu<sup>b</sup>, Jianbo Liu <sup>b, \*</sup>, Hong-Min Meng <sup>a, \*</sup>, and Zhaohui Li<sup>a</sup>

<sup>a</sup> College of Chemistry, Henan Joint International Research Laboratory of Green Construction of Functional Molecules and Their Bioanalytical Applications, Zhengzhou Key Laboratory of Functional Nanomaterial and Medical Theranostic, Zhengzhou University, Zhengzhou 450001, China

<sup>b</sup> Henan Key Laboratory of Precision Diagnosis of Respiratory Infectious Diseases, Zhengzhou Key Laboratory of Precision Diagnosis of Respiratory Infectious Diseases,

The Second Affiliated Hospital of Zhengzhou University, Zhengzhou, Henan 450014, China

Scheme:

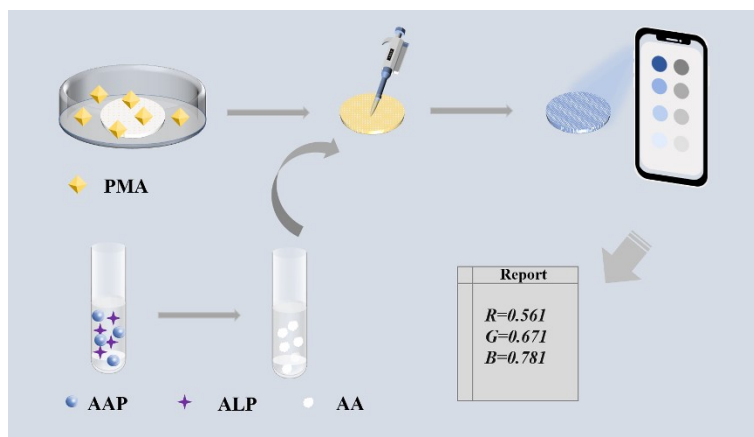

Scheme S1. The schematic diagram illustrating of the test kit for ALP sensing.

Figures:

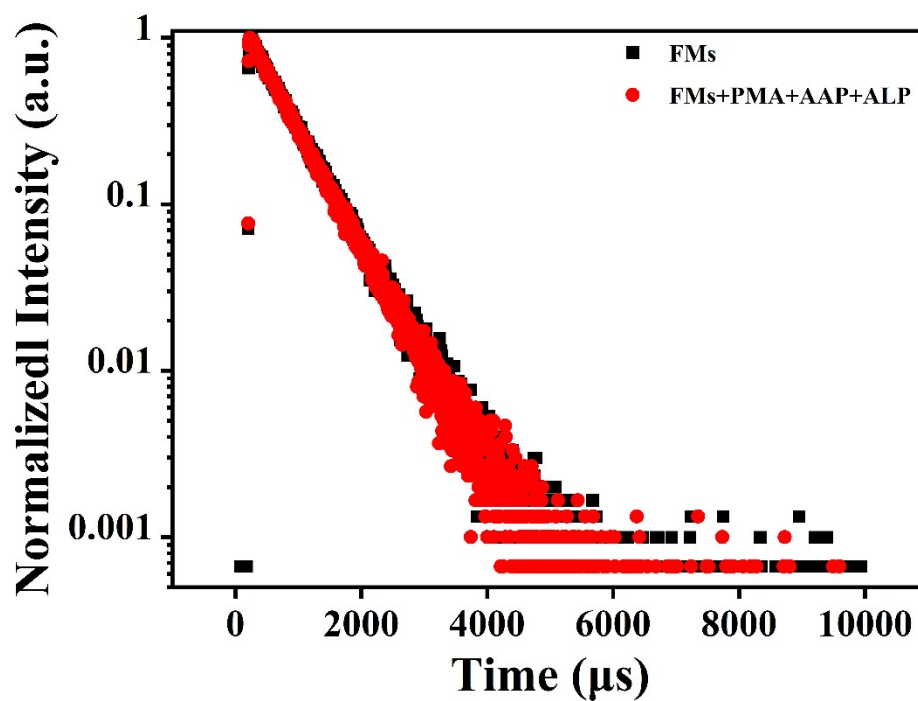

Fig. S1. The tithe-resolved spectroscopy spectra of FMs in the absence and presence of ALP.

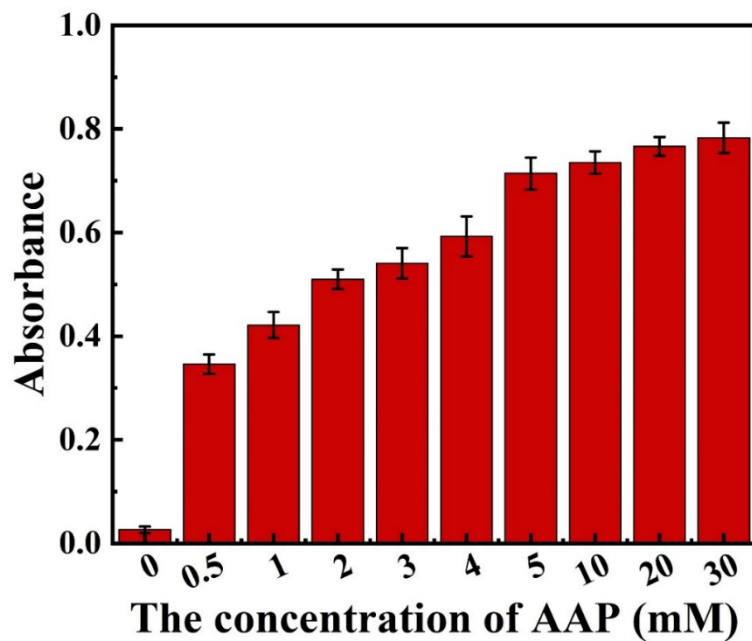

**Fig. S2.** The effect of the concentration of AAP on the UV-vis absorption intensity of the dual-mode sensing system.

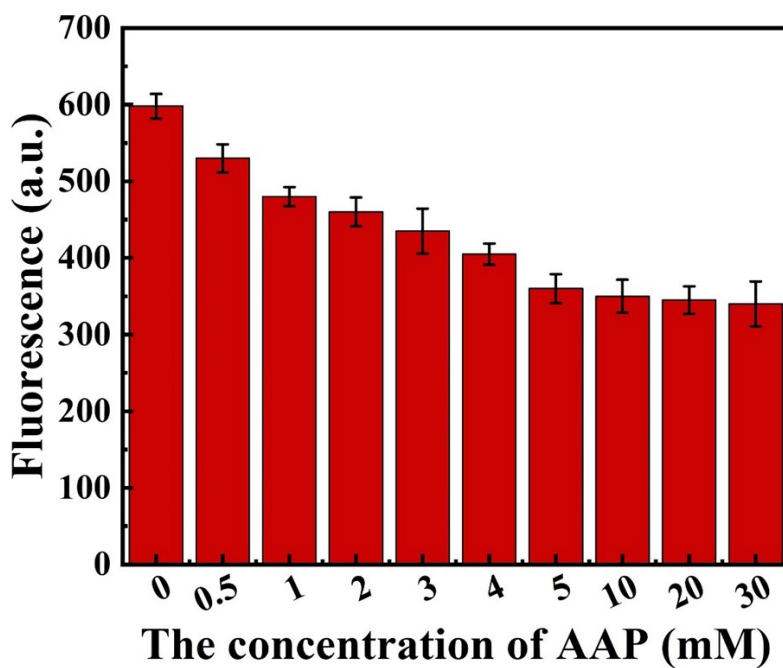

**Fig. S3.** The effect of the concentration of AAP on the fluorescence intensity of the dual-mode sensing system.

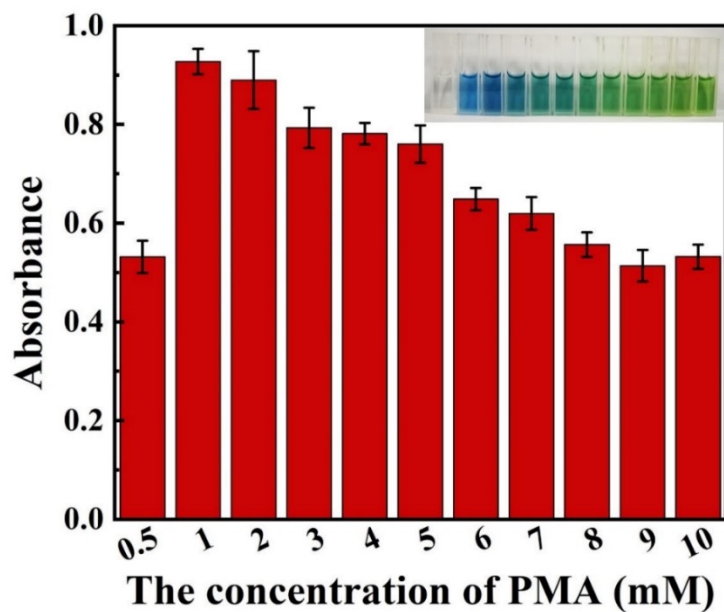

**Fig.S4.** The effect of the concentration of PMA on the UV-vis absorption intensity.

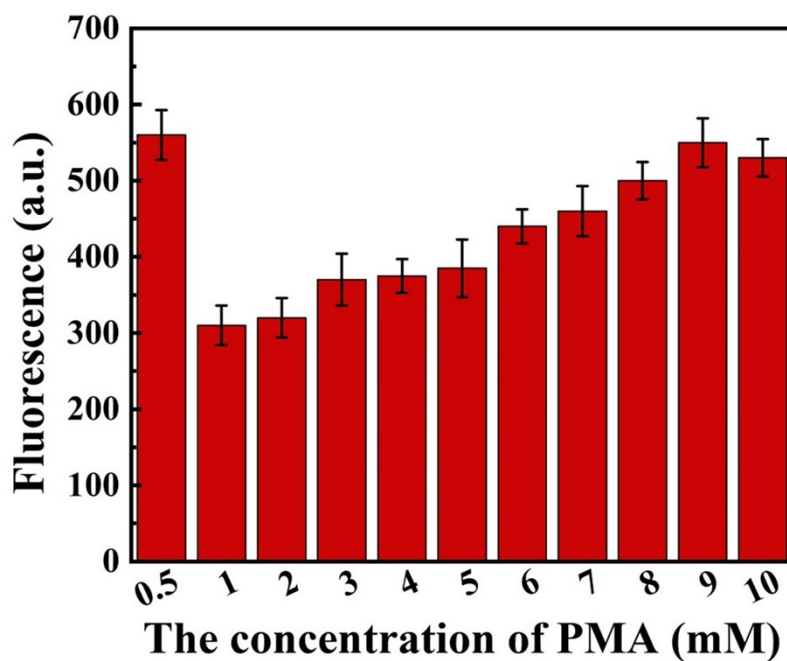

**Fig. S5.** The effect of the concentration of PMA on the fluorescence intensity.

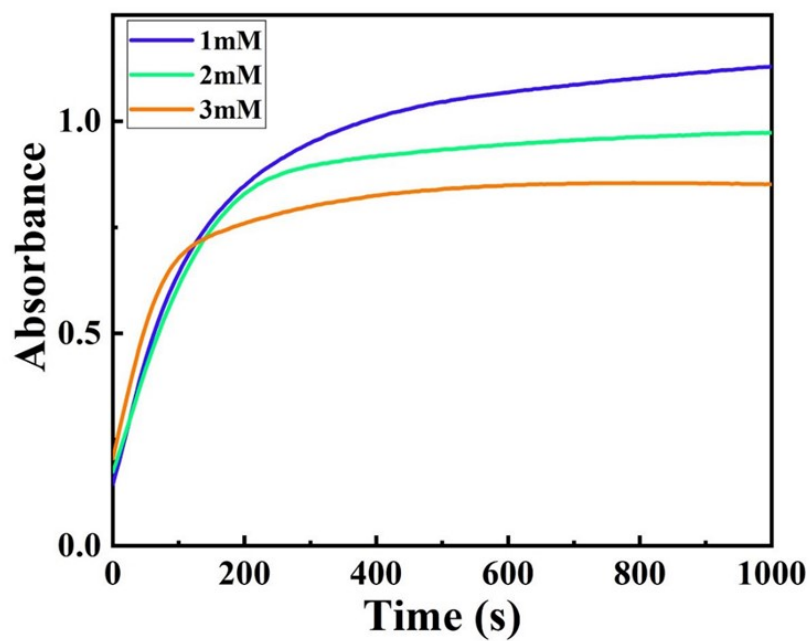

Fig. S6. The effect of PMA concentration on reaction time.

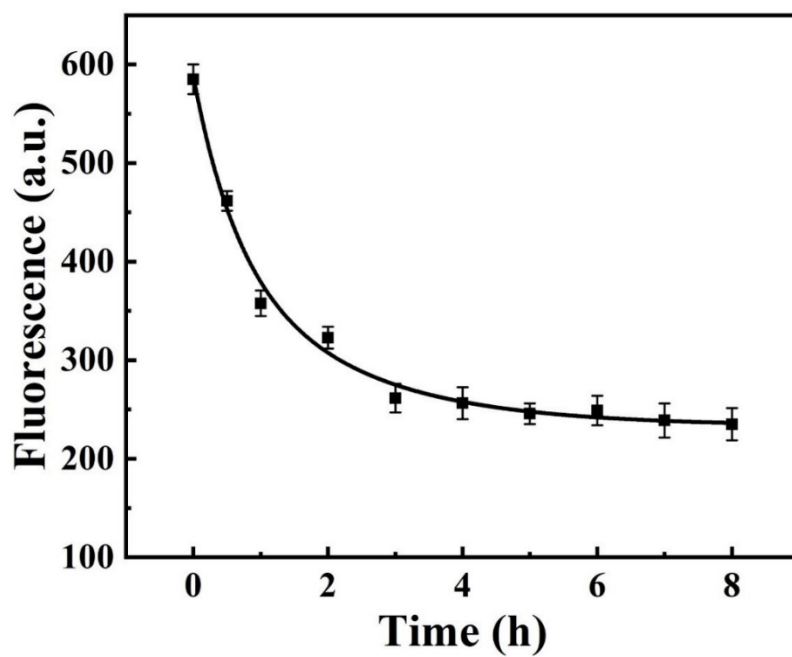

Fig. S7. The effect of the incubation time on fluorescence quenching efficiency.

2 mm  


4 mm  


6 mm  


| 2mm         | 1     | 2     | 3     | 4     | 5     | 6     | 7     | 8     | 9     | 10    | RSD(%) |
|-------------|-------|-------|-------|-------|-------|-------|-------|-------|-------|-------|--------|
| R/225       | 0.71  | 0.698 | 0.690 | 0.737 | 0.714 | 0.710 | 0.694 | 0.718 | 0.698 | 0.702 | 2.0    |
| G/225       | 0.796 | 0.796 | 0.788 | 0.835 | 0.804 | 0.784 | 0.784 | 0.808 | 0.788 | 0.792 |        |
| B/225       | 0.725 | 0.710 | 0.702 | 0.749 | 0.730 | 0.710 | 0.740 | 0.729 | 0.710 | 0.714 |        |
| 255*B/(R*B) | 1.283 | 1.278 | 1.291 | 1.217 | 1.272 | 1.276 | 1.312 | 1.257 | 1.291 | 1.284 |        |
| <b>4mm</b>  |       |       |       |       |       |       |       |       |       |       |        |
| R/225       | 0.690 | 0.671 | 0.718 | 0.659 | 0.706 | 0.659 | 0.686 | 0.686 | 0.659 | 0.675 | 3.7    |
| G/225       | 0.780 | 0.769 | 0.796 | 0.757 | 0.796 | 0.749 | 0.776 | 0.780 | 0.749 | 0.765 |        |
| B/225       | 0.675 | 0.678 | 0.702 | 0.671 | 0.698 | 0.671 | 0.698 | 0.686 | 0.671 | 0.686 |        |
| 255*B/(R*B) | 1.254 | 1.314 | 1.228 | 1.345 | 1.242 | 1.359 | 1.311 | 1.282 | 1.359 | 1.328 |        |
| <b>6mm</b>  |       |       |       |       |       |       |       |       |       |       |        |
| R/225       | 0.647 | 0.643 | 0.639 | 0.710 | 0.663 | 0.702 | 0.624 | 0.596 | 0.671 | 0.627 | 7.5    |
| G/225       | 0.753 | 0.749 | 0.737 | 0.800 | 0.749 | 0.776 | 0.729 | 0.698 | 0.757 | 0.714 |        |
| B/225       | 0.678 | 0.675 | 0.651 | 0.694 | 0.663 | 0.663 | 0.663 | 0.647 | 0.667 | 0.635 |        |
| 255*B/(R*B) | 1.392 | 1.402 | 1.382 | 1.222 | 1.335 | 1.217 | 1.457 | 1.555 | 1.313 | 1.418 |        |

**Fig. S8.** Optimization of the color range for the portable paper-based kit.

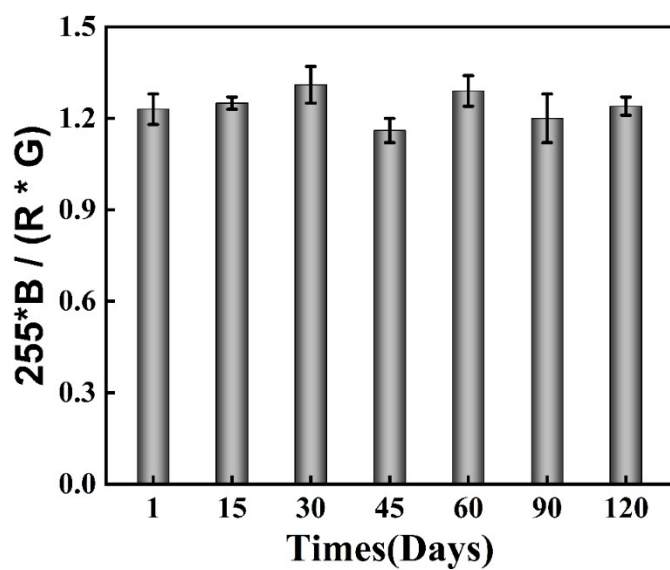

**Fig. S9.** The stability of the developed test strip.

**Table:**

**Table S1. Comparison of different strategies for ALP assay.**

| Method                     | Probe                    | Linear range (U/L) | LOD (U/L) | Ref       |
|----------------------------|--------------------------|--------------------|-----------|-----------|
| Fluorescence               | Coumarin @Tb-GMP ICPNPs  | 25~200             | 10        | 1         |
| Fluorescence               | PDA-NDs                  | 1~50               | 0.94      | 2         |
| Colorimetry                | Cu (BPDS) <sup>2-</sup>  | 0~200              | 1.75      | 3         |
| Colorimetry                | G <sub>20</sub> -Cu (II) | 20~200             | 0.84      | 4         |
| Fluorescence               | FMs-PMA                  | 0.2~30             | 0.11      |           |
| Colorimetry                | FMs-PMA                  | 0.2~35             | 0.27      | This work |
| Paper based - colorimetric | FMs-PMA                  | 2~50               | 0.4       |           |

**Reference:**

1. J. Deng, P. Yu, Y. Wang, and L. Mao, *Anal. Chem.*, 2015, 87, 3080-3086.
2. Q. Xue, X. Cao, C. Zhang and Y. Xian, *Microchim. Acta*, 2018, 185, 231.
3. Q. Hu, M. He, Y. Mei, W. Feng, S. Jing, J. Kong and X. Zhang, *Talanta*, 2016, 163, 146-152.
4. J. Yang, L. Zheng, Y. Wang, W. Li, J. Zhang, J. Gu and Yan Fu, *Biosens. Bioelectron.*, 2015, 77, 549-556.
